# Supplementary material for: Dramatic promotion of copper–alumina catalysts by sodium for acetone trimerisation
Source: Royal Society of Chemistry journal article supplement (doi:10.1039/c4cy00440j), 2014-01-01
Supplement: c4cy00440j1.pdf [file c4cy00440j1.pdf]

Supporting Information to:

Dramatic promotion of copper-alumina catalysts by sodium for acetone trimerisation

Emanuelle Ligner,<sup>a</sup> Frédéric Meunier,<sup>b</sup> Arnaud Travert,<sup>c</sup> Sylvie Maury<sup>a</sup> and Nicolas Cadran<sup>\*a</sup>

Product distribution details for all catalysts presented.

Table S1 : Abbreviation used

|                |                                                   |        |                                    |
|----------------|---------------------------------------------------|--------|------------------------------------|
| Light products | propene/propane<br>isobutene/isobutene<br>methane |        |                                    |
| IPA            | 2-propanol                                        | DIBA   | 2,6-dimethylheptan-4-ol            |
| MIBK           | 4-methylpentan-2-one                              | TMB    | 1,3,5-trimethylbenzene             |
| MIBA           | 4-methylpentan-2-ol                               | others | C <sub>12</sub> , unknown products |
| 2-MP           | 2-methylpentane                                   |        |                                    |
| DIBK           | 2,6-dimethylheptan-4-one                          |        |                                    |

Table S2 : Product distribution

|                        | Catalyst A |         | Catalyst B |         | Catalyst C |         | Catalyst D |         | Catalyst E |         |
|------------------------|------------|---------|------------|---------|------------|---------|------------|---------|------------|---------|
|                        | 10 min     | 120 min |
| Acetone Conversion (%) | 62.3       | 38.5    | 74.3       | 57.6    | 69.9       | 68.7    | 59.5       | 59.5    | 53.3       | 48      |
| Selectivity (%)        |            |         |            |         |            |         |            |         |            |         |
| Light products         | 23.4       | 27.0    | 12.3       | 13.6    | 7.1        | 6.7     | 6.7        | 6.6     | 3.6        | 3.3     |
| IPA                    | 13.1       | 37.2    | 7.2        | 15.4    | 8.7        | 9.0     | 15.4       | 15.7    | 19.8       | 25.2    |
| MIBK                   | 26.9       | 25.8    | 23.7       | 31.3    | 25.5       | 26.3    | 30.6       | 31.2    | 38.6       | 38.1    |
| MIBA                   | 2.6        | 3.0     | 2.2        | 3.1     | 2.5        | 2.5     | 3.2        | 3.4     | 4.1        | 4.2     |
| 2-MP                   | 0.9        | 0.7     | 0.5        | 0.4     | 0.5        | 0.5     | 0.3        | 0.3     | 0.3        | 0.3     |
| DIBK                   | 25.9       | 5.2     | 44.7       | 30.4    | 45.7       | 45.1    | 37.3       | 36.4    | 29.0       | 25.4    |
| DIBA                   | 0.0        | 0.0     | 0.0        | 0.0     | 1.9        | 1.9     | 1.6        | 1.7     | 1.3        | 1.2     |
| TMB                    | 0.6        | 0.3     | 0.6        | 0.7     | 0.6        | 0.6     | 0.6        | 0.6     | 0.8        | 0.7     |
| others                 | 6.6        | 0.8     | 8.8        | 5.1     | 7.5        | 7.4     | 4.3        | 4.1     | 2.5        | 1.6     |

Table S3 : Yield of the different products

|                | Catalyst A |         | Catalyst B |         | Catalyst C |         | Catalyst D |         | Catalyst E |         |
|----------------|------------|---------|------------|---------|------------|---------|------------|---------|------------|---------|
|                | 10 min     | 120 min |
| Yield (%)      |            |         |            |         |            |         |            |         |            |         |
| Light products | 14.6       | 10.4    | 9.1        | 7.8     | 5.0        | 4.6     | 4.0        | 3.9     | 1.9        | 1.6     |
| IPA            | 8.2        | 14.3    | 5.3        | 8.9     | 6.1        | 6.2     | 9.2        | 9.3     | 10.6       | 12.1    |
| MIBK           | 16.8       | 9.9     | 17.6       | 18.0    | 17.8       | 18.1    | 18.2       | 18.6    | 20.6       | 18.3    |
| MIBA           | 1.6        | 1.2     | 1.6        | 1.8     | 1.7        | 1.7     | 1.9        | 2.0     | 2.2        | 2.0     |
| 2-MP           | 0.6        | 0.3     | 0.4        | 0.2     | 0.3        | 0.3     | 0.2        | 0.2     | 0.2        | 0.1     |
| DIBK           | 16.1       | 2.0     | 33.2       | 17.5    | 31.9       | 31.0    | 22.2       | 21.7    | 15.5       | 12.2    |
| DIBA           | 0.0        | 0.0     | 0.0        | 0.0     | 1.3        | 1.3     | 1.0        | 1.0     | 0.7        | 0.6     |
| TMB            | 0.4        | 0.1     | 0.4        | 0.4     | 0.4        | 0.4     | 0.4        | 0.4     | 0.4        | 0.3     |
| others         | 4.1        | 0.3     | 6.5        | 2.9     | 5.2        | 5.1     | 2.6        | 2.4     | 1.3        | 0.8     |
